# Supplementary material
Source: publisher figshare collection journal article supplement (https://acs.figshare.com/ndownloader/files/3860278)
Supplement: Supplementary file 1 [file 3860278]

**Supporting Information Available:** Supplementary Figures 1 and 2 below show a lack of correlation between current size and GABA dose-response parameters,  $EC_{50}$  and Hill coefficient, respectively.

### Supplementary Figures

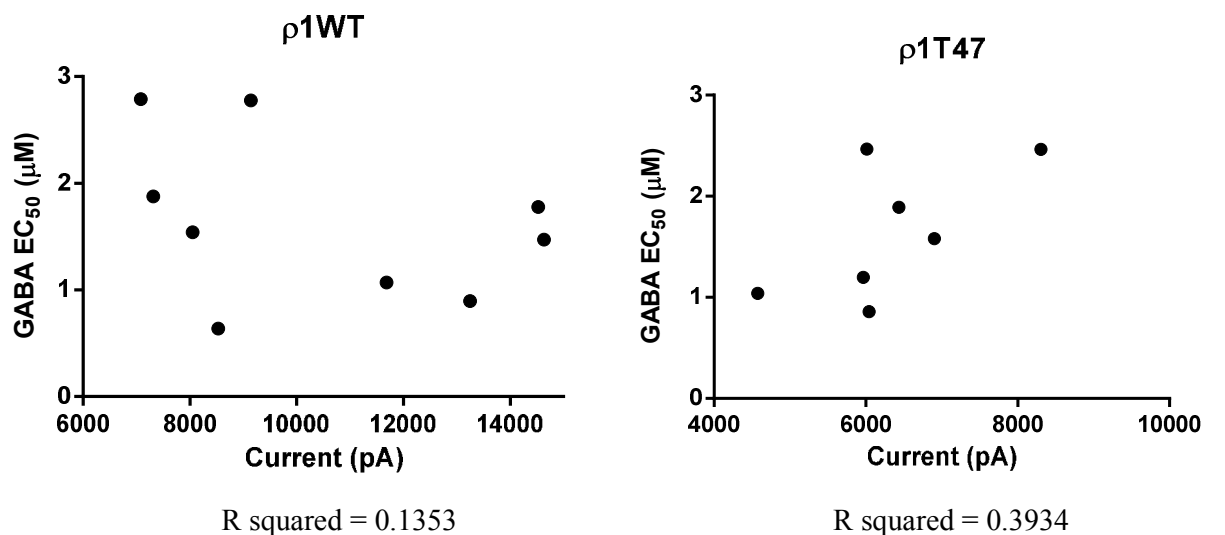

Figure 1. Correlation between the current size and GABA  $EC_{50}$  in p1WT and p1T47.

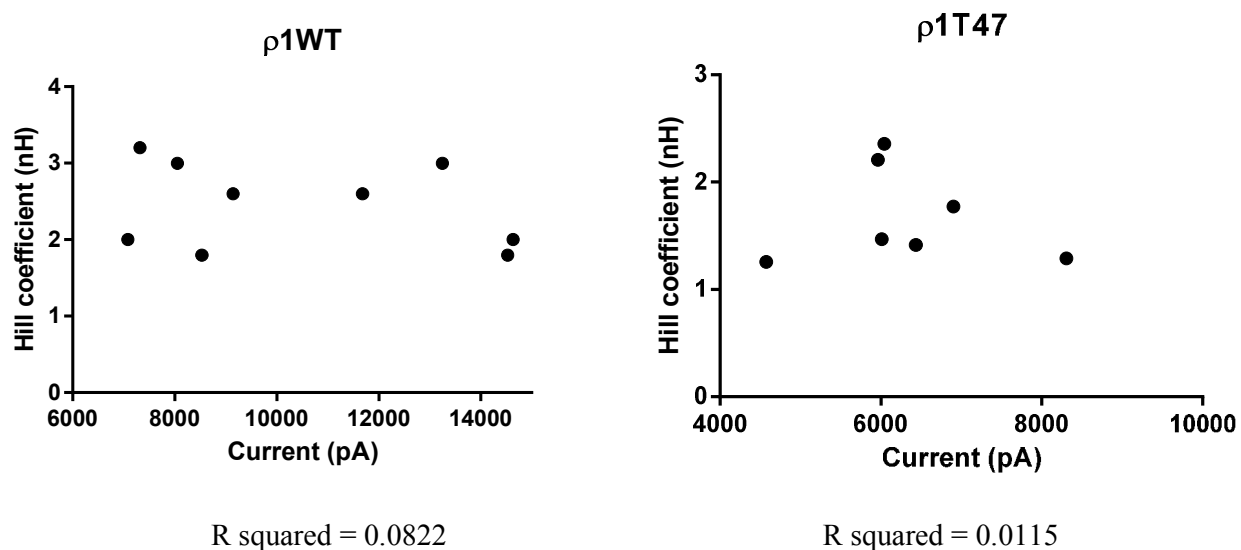

Figure 2. Correlation between the current size and Hill coefficient in p1WT and p1T47.
